# Supplementary material for: Transcriptional responses of Arabidopsis thaliana plants to As (V) stress
Source: PubMed Central journal article supplement (PMC2547109; doi:10.1186/1471-2229-8-87), 2008-08-06
Supplement: 1471-2229-8-87-S1.pdf [file 1471-2229-8-87-S1.pdf]

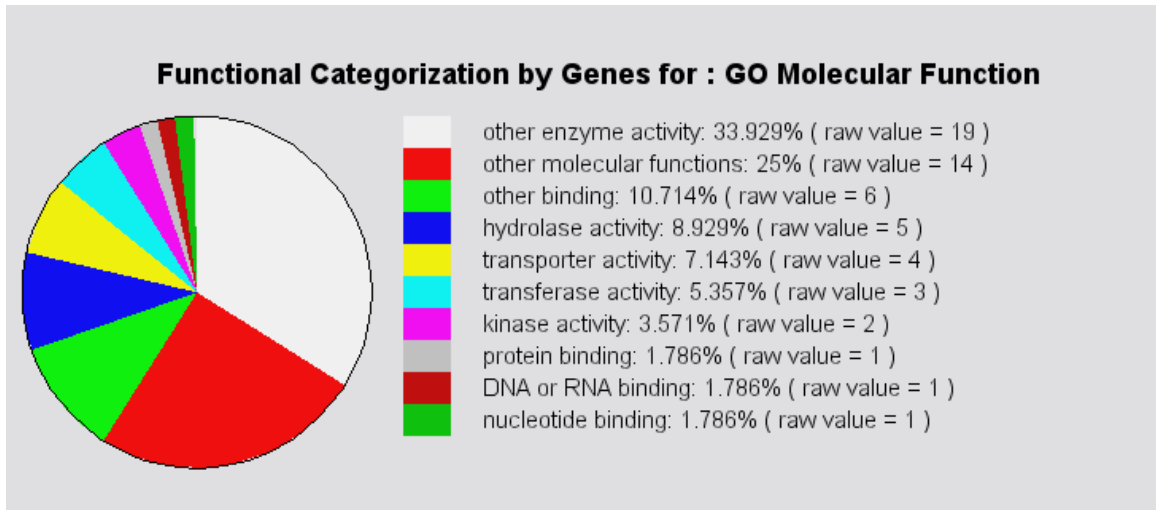

(a)

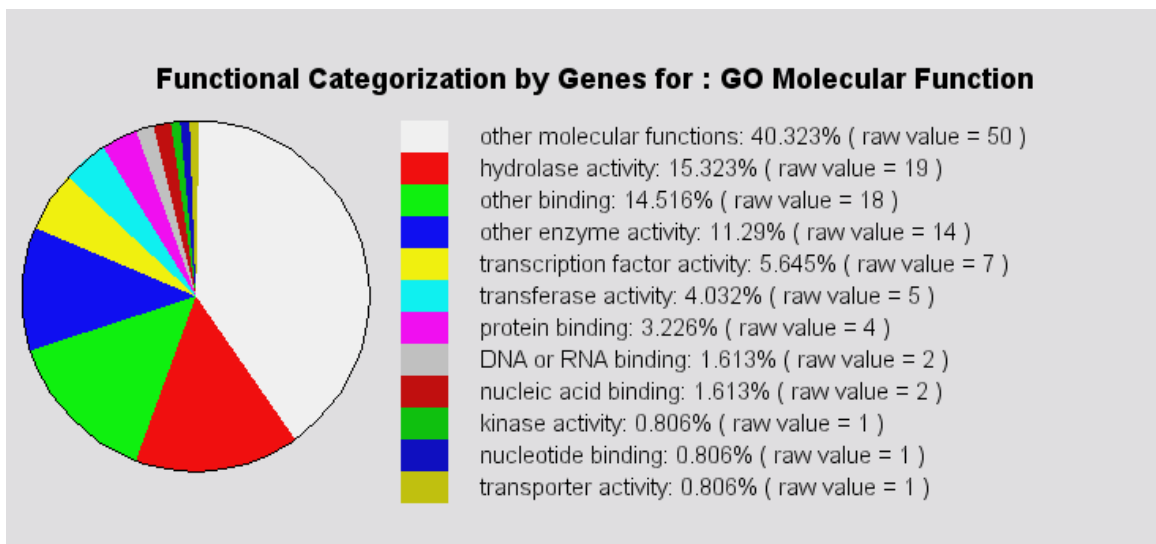

(b)

Figure S1. Functional characterization of differentially expressed *A. thaliana* genes in response to arsenate stress. A, gene ontology for genes induced above 1.5-fold. B, gene ontology for genes repressed 1.5-fold. All differentially expressed genes met a significance criteria of  $P < 0.001$  and had an FDR of  $< 1\%$ .
